# Supplementary material
Source: PubMed Central journal article supplement (PMC3581981)
Supplement: 1222663110_pnas.201222663SI.pdf [file 1222663110_pnas.201222663SI.pdf]

# Supporting Information

Sontag et al. 10.1073/pnas.1222663110

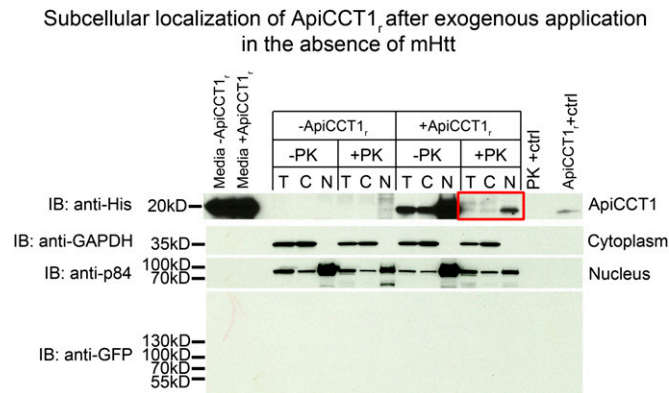

**Fig. S1.** Exogenous recombinant apical CCT1 enters cells and localizes to the nucleus of PC12 cells independent of the presence of mHtt. The experiment shown in Fig. 4 was repeated using uninduced 14A2.6 cells with the same result, indicating that ApiCCT1<sub>r</sub> is able to enter the nucleus in the absence of mHtt aggregates.

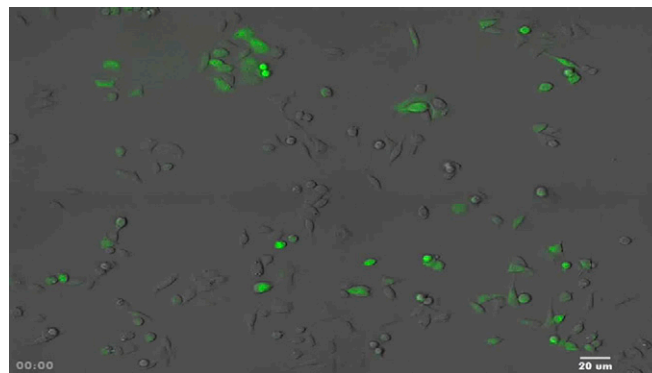

**Movie S1.** ApiCCT1<sub>r</sub> delays inclusion body formation in 14A2.6 cells. Representative video showing the lag phase of inclusion body formation in 14A2.6 cells treated with ApiCCT1<sub>r</sub>.

[Movie S1](#)
